# Supplementary material for: Angiotensin II-induced muscle atrophy via PPARγ suppression is mediated by miR-29b
Source: PubMed Central journal article supplement — Mol Ther Nucleic Acids. 2020 Dec 25;23:743–56. doi: 10.1016/j.omtn.2020.12.015 (PMC7868689; doi:10.1016/j.omtn.2020.12.015), 2020-12-25
Supplement: mmc1.pdf [file mmc1.pdf]

OMTN, Volume 23

## Supplemental Information

**Angiotensin II-induced muscle atrophy**

**via PPAR $\gamma$  suppression is mediated by miR-29b**

**Jin Li, Tingting Yang, Zhao Sha, Haifei Tang, Xuejiao Hua, Lijun Wang, Zitong Wang, Ziyu Gao, Joost P.G. Sluijter, Glenn C. Rowe, Saumya Das, Liming Yang, and Junjie Xiao**

## Figure S1

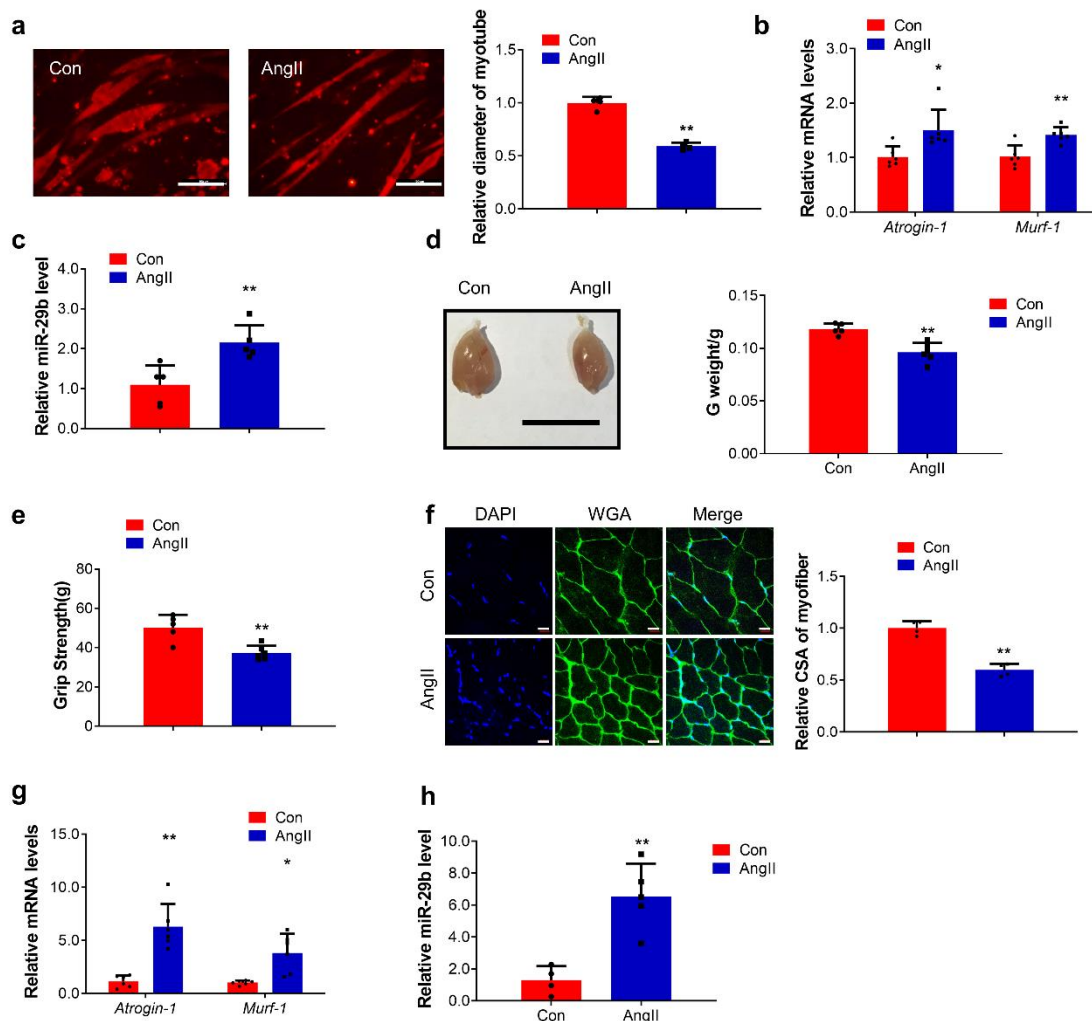

**Figure S1. miR-29b is elevated in AngII-induced muscle atrophy.** (a) Immunofluorescent staining for C2C12 myotubes followed by determination of myotube diameter in AngII-induced muscle atrophy *in vitro*. Scale bar: 100 $\mu$ m. n=4 per group. (b) qRT-PCR analysis of *Atrogin-1* and *Murf-1* expressions in AngII-induced muscle atrophy *in vitro*. n=6 per group. (c) qRT-PCR analysis of miR-29b expression in AngII-induced muscle atrophy *in vitro*. n=5 per group. (d) Gastrocnemius muscle morphology (scale bar: 1 cm) and gastrocnemius weight (GW) of control and AngII treated mice. n=5,6. (e) The grip strength of right hind limb in control and AngII treated mice. n=5,6. (f) Wheat germ agglutinin (WGA) staining was performed to quantify muscle fiber cross sectional area (CSA) from control and AngII treated mice. Scale bar: 20 $\mu$ m. n=4 per group. (g) qRT-PCR analysis of *Atrogin-1* and *Murf-1* expression in gastrocnemius muscles from control and AngII treated mice. n=5, 6. (h) qRT-PCR analysis of miR-29b expression in gastrocnemius muscles from control and AngII treated mice. n=4,5. Con, Control. AngII, Angiotension II. GW, Gastrocnemius weight. Data are shown as mean  $\pm$ SD. \*, P<0.05. \*\*, P<0.01.

## Figure S2

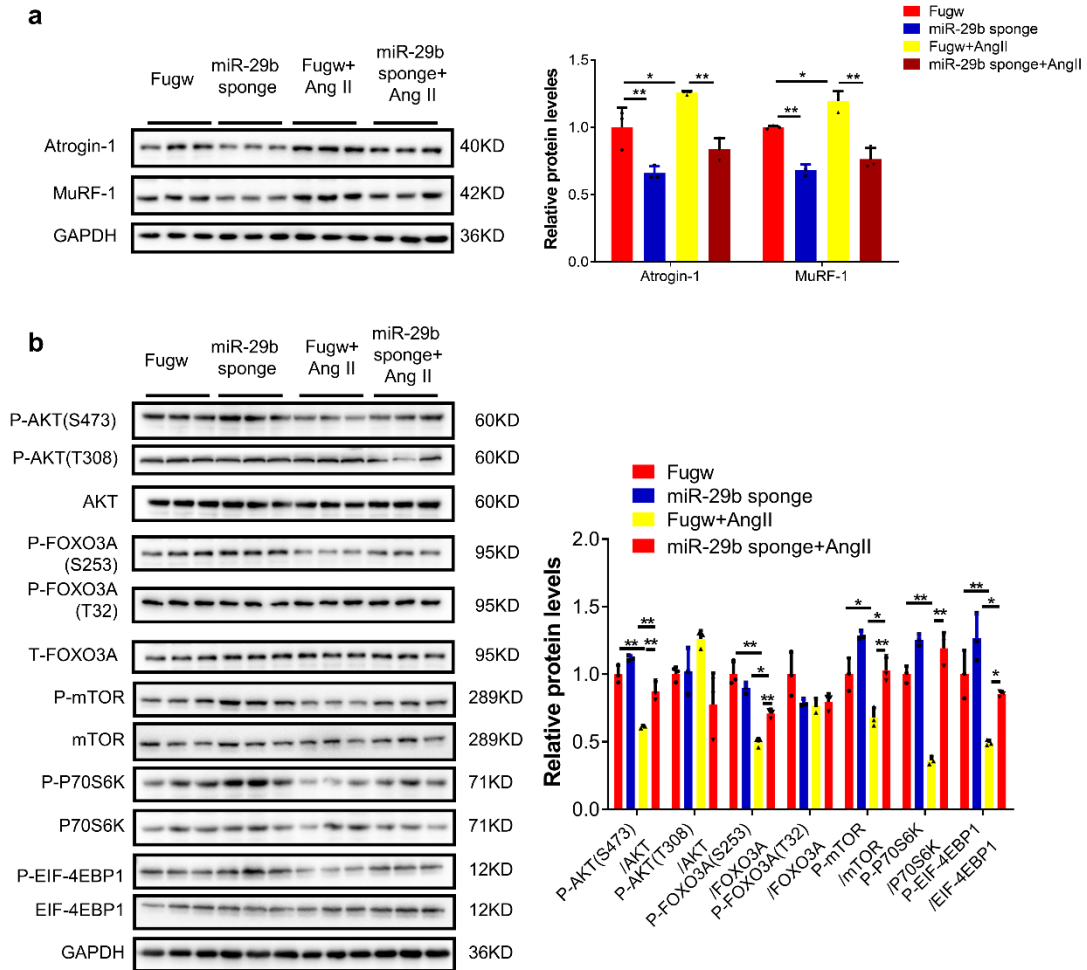

**Figure S2. miR-29b inhibition ameliorates AngII-induced muscle atrophy *in vivo*.** (a) Western blot analysis of Atrogin-1 and MuRF-1 expressions in control and AngII mice treated with Fugw or miR-29b sponge.  $n=3$  per group. (b) Western blot analysis for the AKT/FOXO3A/mTOR pathway (AKT, FOXO3A, mTOR, P70S6K, 4EBP1) in control and AngII mice treated with Fugw or miR-29b sponge.  $n=3$  per group. Data are shown as mean  $\pm$ SD. \*,  $P<0.05$ . \*\*,  $P<0.01$ .

## Figure S3

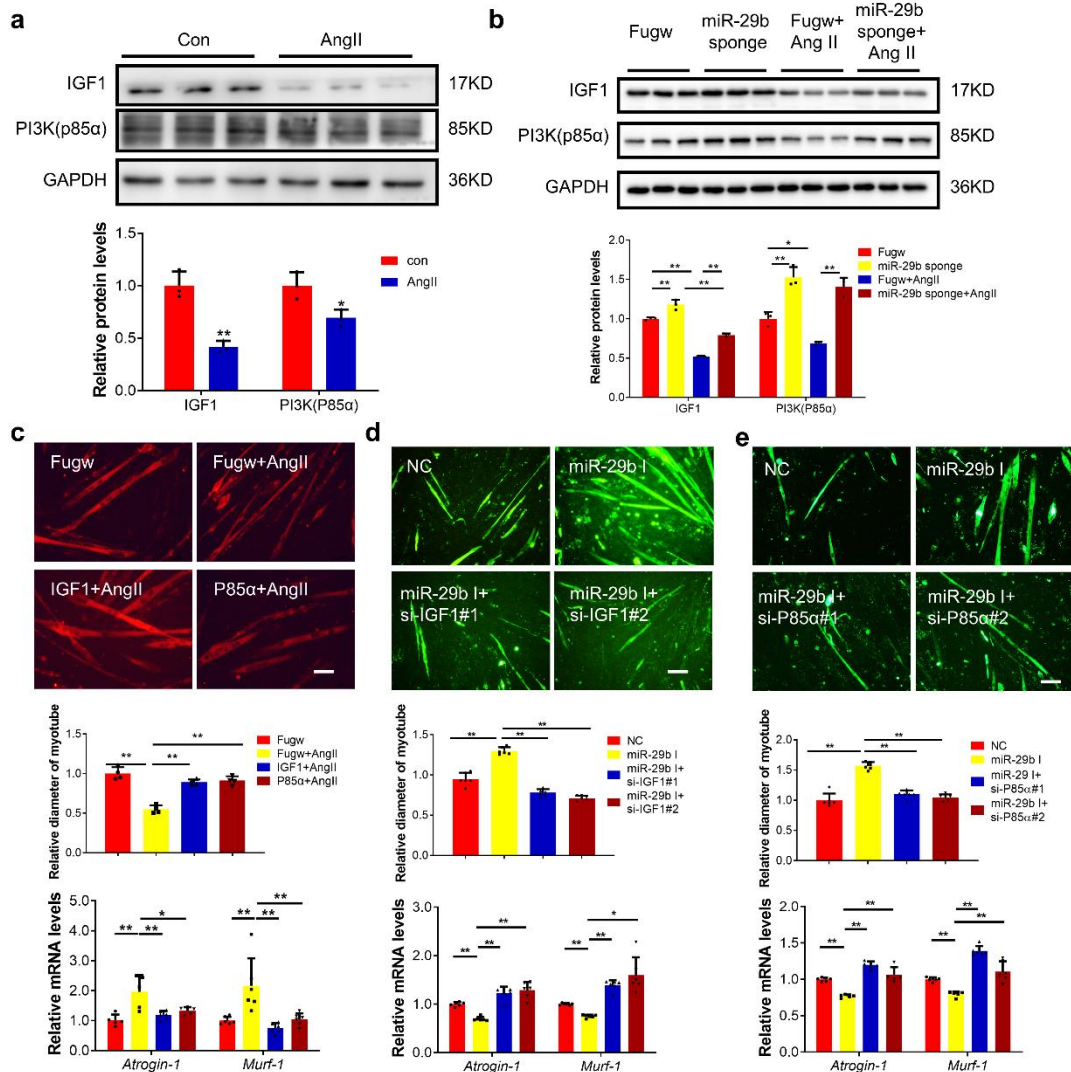

**Figure S3. miR-29b mediates AngII-induced muscle atrophy by targeting IGF1, PI3K(p85α).** (a) Western blot analysis of IGF1 and PI3K(p85α) protein level in control and AngII-induced muscle atrophy cellular model. n=3 per group. (b) Western blot analysis of IGF1 and PI3K(p85α) protein level in the gastrocnemius from control and AngII mice treated with Fugw or miR-29b sponge. n=3 per group. (c) Immunofluorescent staining for C2C12 myotubes and qRT-PCR analysis of *Atrogin-1* and *Murf-1* expression in IGF1 or PI3K(p85α) overexpression in AngII treated C2C12 myotube. Scale bar: 100μm. n=4 per group for staining. n=5-6 per group for qRT-PCR. (d) Immunofluorescent staining for C2C12 myotubes and qRT-PCR analysis of *Atrogin-1* and *Murf-1* expression for C2C12 myotubes when knockdown IGF1 together with miR-29b inhibition in AngII-induced muscle atrophy. Scale bar: 100μm. n=6 per group. (e) Immunofluorescent staining for C2C12 myotubes and qRT-PCR analysis of *Atrogin-1* and *Murf-1* expression for C2C12 myotubes when knockdown P85α together with miR-29b inhibition in AngII-induced muscle atrophy. Scale bar: 100μm. n=6 per group in immunofluorescent staining; n=6,5,6,6 in qRT-PCR. Data are shown as mean ±SD. \*, P<0.05. \*\*, P<0.01.

## Figure S4

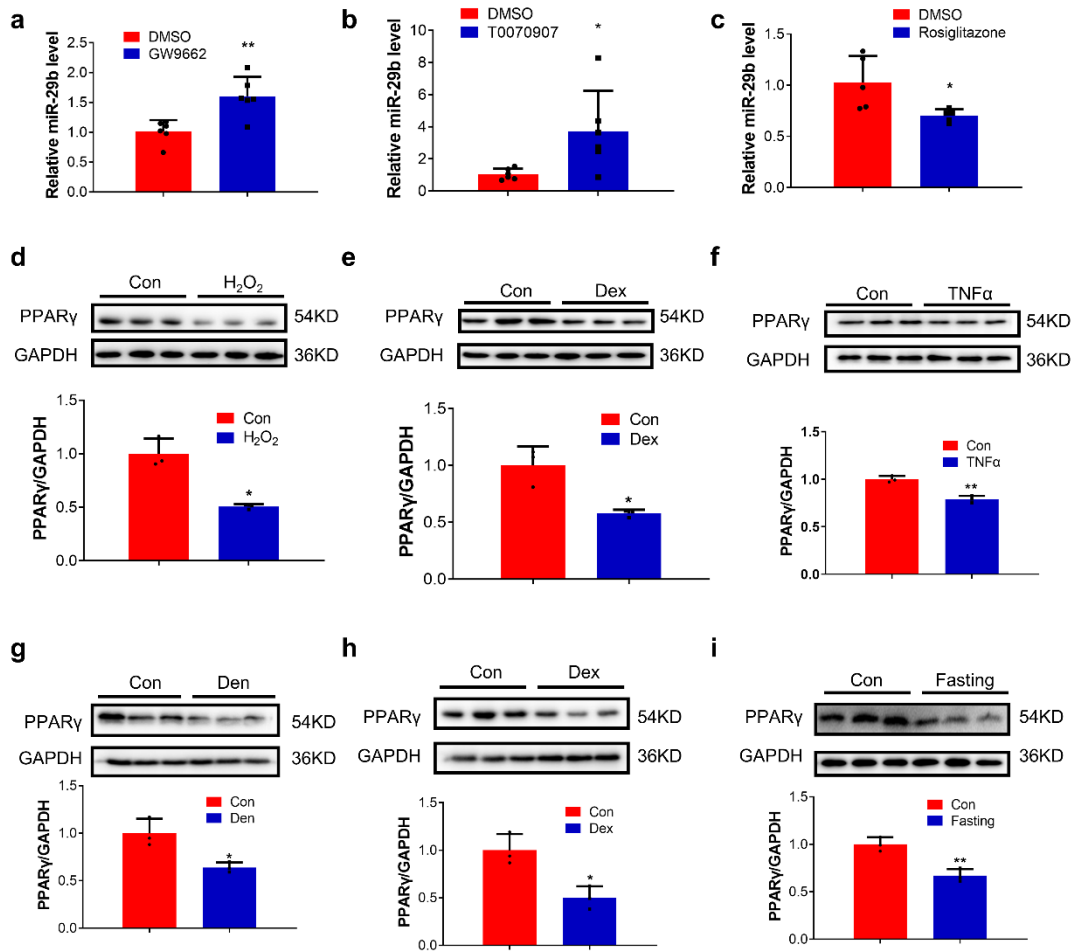

**Figure S4. PPAR $\gamma$  acts as an upstream regulator of miR-29b.** (a) qRT-PCR analysis of miR-29b expression when C2C12 myotubes were treated with PPAR $\gamma$  antagonist GW9662. n=6 per group. (b) qRT-PCR analysis of miR-29b expression when C2C12 myotubes were treated with PPAR $\gamma$  antagonist T0070907. n=6 per group. (c) qRT-PCR analysis of miR-29b expression when C2C12 myotubes were treated with PPAR $\gamma$  agonist rosiglitazone. n=5 per group. (d) Western blot analysis of PPAR $\gamma$  protein level in H<sub>2</sub>O<sub>2</sub> induced muscle atrophy *in vitro*. n=3 per group. (e) Western blot analysis of PPAR $\gamma$  protein level in Dex induced muscle atrophy *in vitro*. n=3 per group. (f) Western blot analysis of PPAR $\gamma$  protein level in TNF $\alpha$  induced muscle atrophy *in vitro*. n=3 per group. (g) Western blot analysis of PPAR $\gamma$  protein level in the gastrocnemius from Den induced muscle atrophy *in vivo*. n=3 per group. (h) Western blot analysis of PPAR $\gamma$  protein level in the gastrocnemius from Dex induced muscle atrophy *in vivo*. n=3 per group. (i) Western blot analysis of PPAR $\gamma$  protein level in the gastrocnemius from Fasting induced muscle atrophy *in vivo*. n=3 per group. Data are shown as mean  $\pm$  SD. \*, P<0.05. \*\*, P<0.01.

## Figure S5

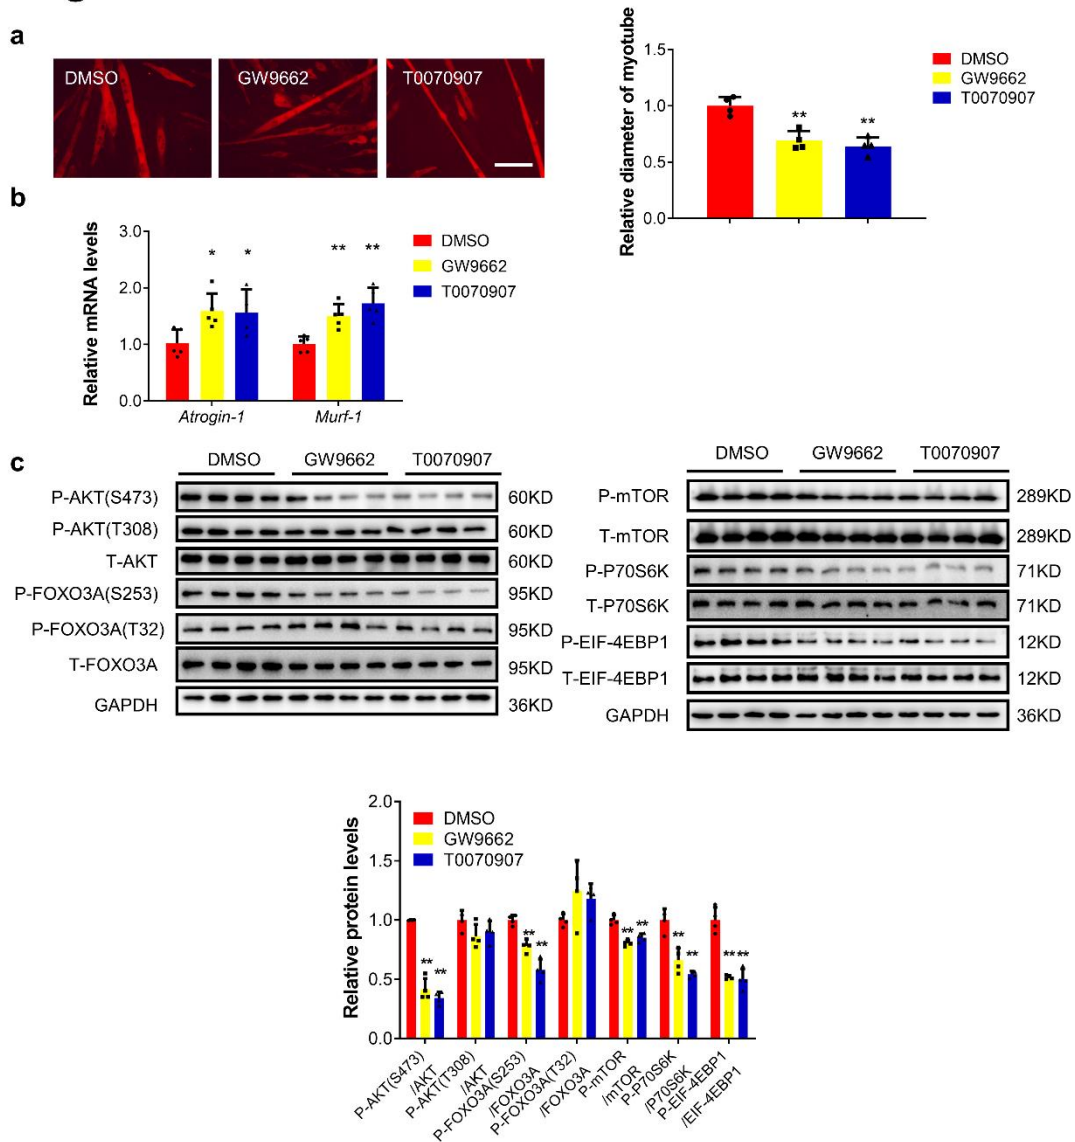

**Figure S5. PPAR $\gamma$  inhibition with antagonists promotes muscle atrophy *in vitro*.** (a) Immunofluorescent staining for C2C12 myotubes followed by determination of myotube diameter in C2C12 myotubes treated with antagonists. Scale bar: 100 $\mu$ m. n=4 per group. (b) qRT-PCR analysis of *Atrogin-1* and *Murf-1* expressions when C2C12 myotubes were treated with antagonists. n=5 per group. (c) Western blot analysis for the AKT/FOXO3A/mTOR pathway (AKT, FOXO3A, mTOR, P70S6K, 4EBP1) when C2C12 myotubes were treated with antagonists. n=4 per group. Data are shown as mean  $\pm$  SD. GW9662 and T0070907 group were compared with DMSO group. \*, P<0.05. \*\*, P<0.01.



## Figure S6

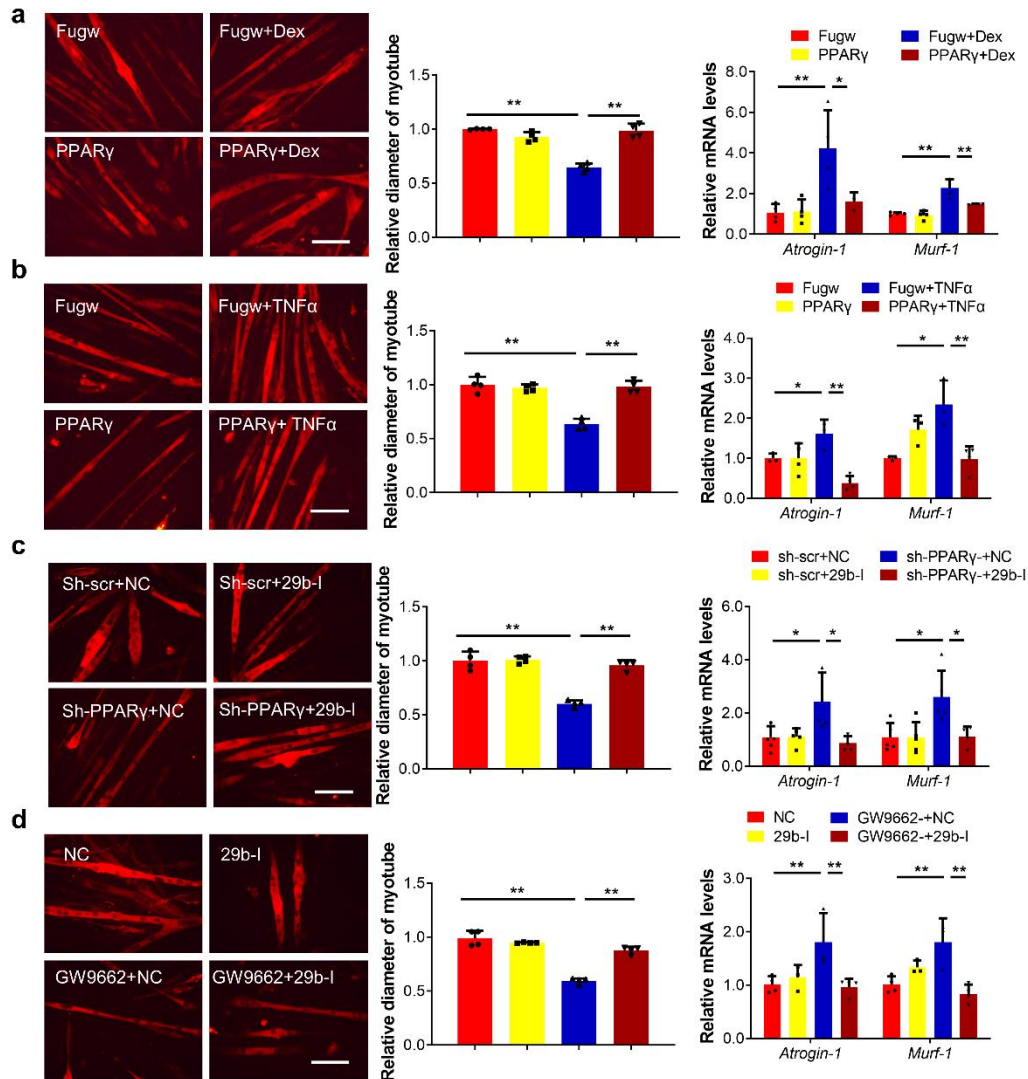

### Figure S6. Activation of PPAR $\gamma$ ameliorates AngII-induced muscle atrophy *in vitro*.

(a) Immunofluorescent staining for C2C12 myotubes followed by determination of myotube diameter and qRT-PCR analysis of *Atrogin-1* and *Murf-1* expressions when myotubes were transfected with Fugw and PPAR $\gamma$  overexpression lentivirus in Dex-induced muscle atrophy model. Scale bar: 100 $\mu$ m. n=4 per group for staining. n=3-4 per group for qRT-PCR. (b) Immunofluorescent staining for C2C12 myotubes followed by determination of myotube diameter and qRT-PCR analysis of *Atrogin-1* and *Murf-1* expressions when myotubes were transfected with Fugw and overexpression lentivirus in TNF $\alpha$  induced muscle atrophy model. Scale bar: 100 $\mu$ m. n=4 per group for staining. n=3-4 per group for qRT-PCR. (c) Immunofluorescent staining for C2C12 myotubes followed by determination of myotube diameter and qRT-PCR analysis of *Atrogin-1* and *Murf-1* expressions when myotubes were transfected with miR-29b inhibitor in PPAR $\gamma$  shRNA induced muscle atrophy model. Scale bar: 100 $\mu$ m. n=4 per group for staining. n=5-6 per group for qRT-PCR. (d) Immunofluorescent staining for C2C12 myotubes followed by determination of myotube diameter and qRT-PCR analysis of *Atrogin-1* and *Murf-1* expressions when myotubes were transfected with miR-29b

inhibitor in PPAR $\gamma$  antagonist GW9662 induced muscle atrophy model. Scale bar: 100 $\mu$ m. n=4 per group for staining. n=3-4 per group for qRT-PCR. Data are shown as mean  $\pm$ SD. \*, P<0.05. \*\*, P<0.01.



**Figure S7**

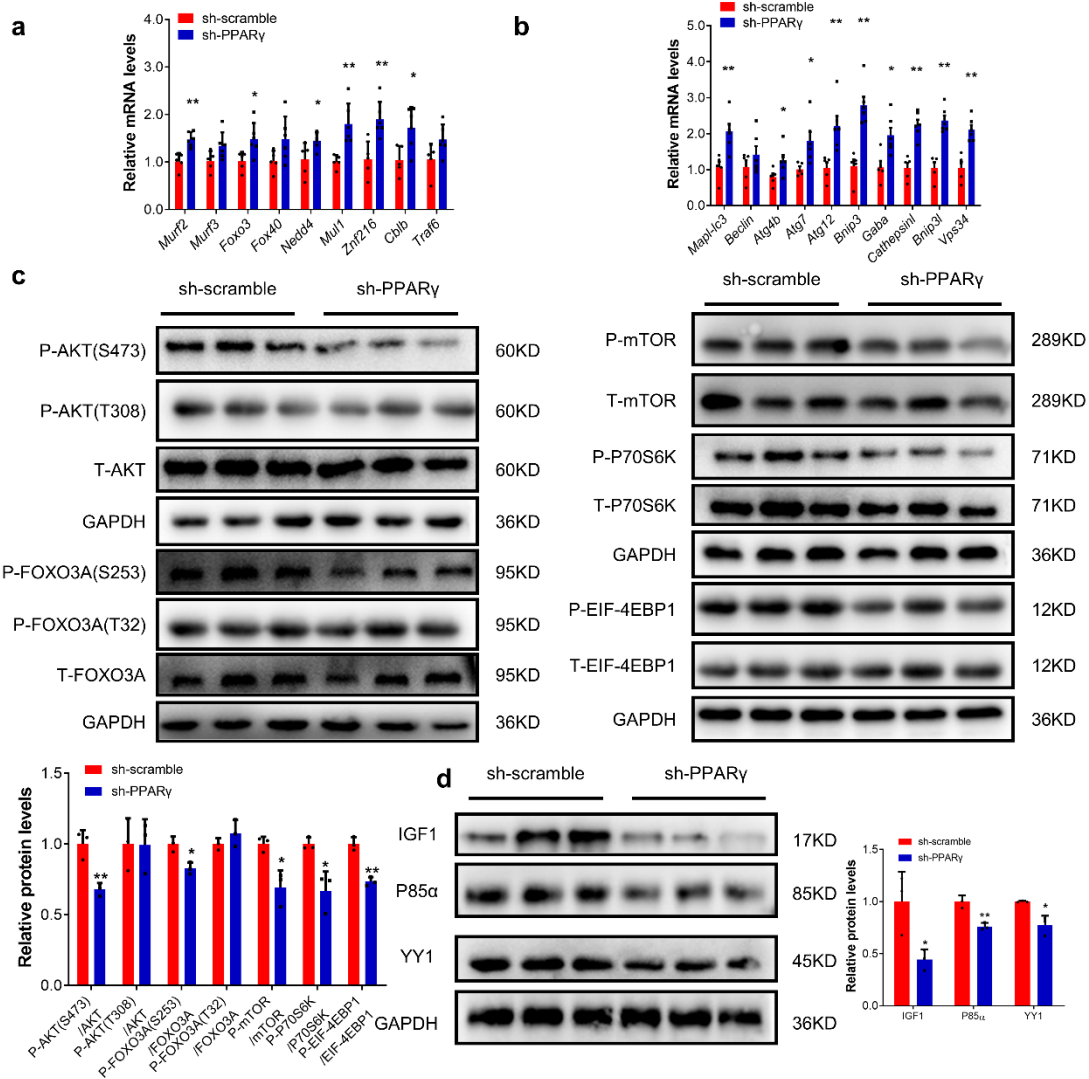

**Figure S7. PPAR $\gamma$  inhibition promotes muscle atrophy in vivo.** (a) qRT-PCR analysis of ubiquitin ligase-related gene expression in sh-scramble and PPAR $\gamma$  shRNA treated mice. n=5,6. (b) qRT-PCR analysis of autophagy-related gene expressions in sh-scramble and PPAR $\gamma$  shRNA treated mice. n=5,6. (c) Western blot analysis for the AKT/FOXO3A/mTOR pathway (AKT, FOXO3A, mTOR, P70S6K, 4EBP1) in sh-scramble and PPAR $\gamma$  shRNA treated mice. n=3 per group. (d) Western blot analysis of IGF1, PI3K(p85 $\alpha$ ) and YY1 expression in sh-scramble and PPAR $\gamma$  shRNA treated mice. n=3 per group. Data are shown as mean  $\pm$ SD. \*, P<0.05. \*\*, P<0.01.

## Figure S8

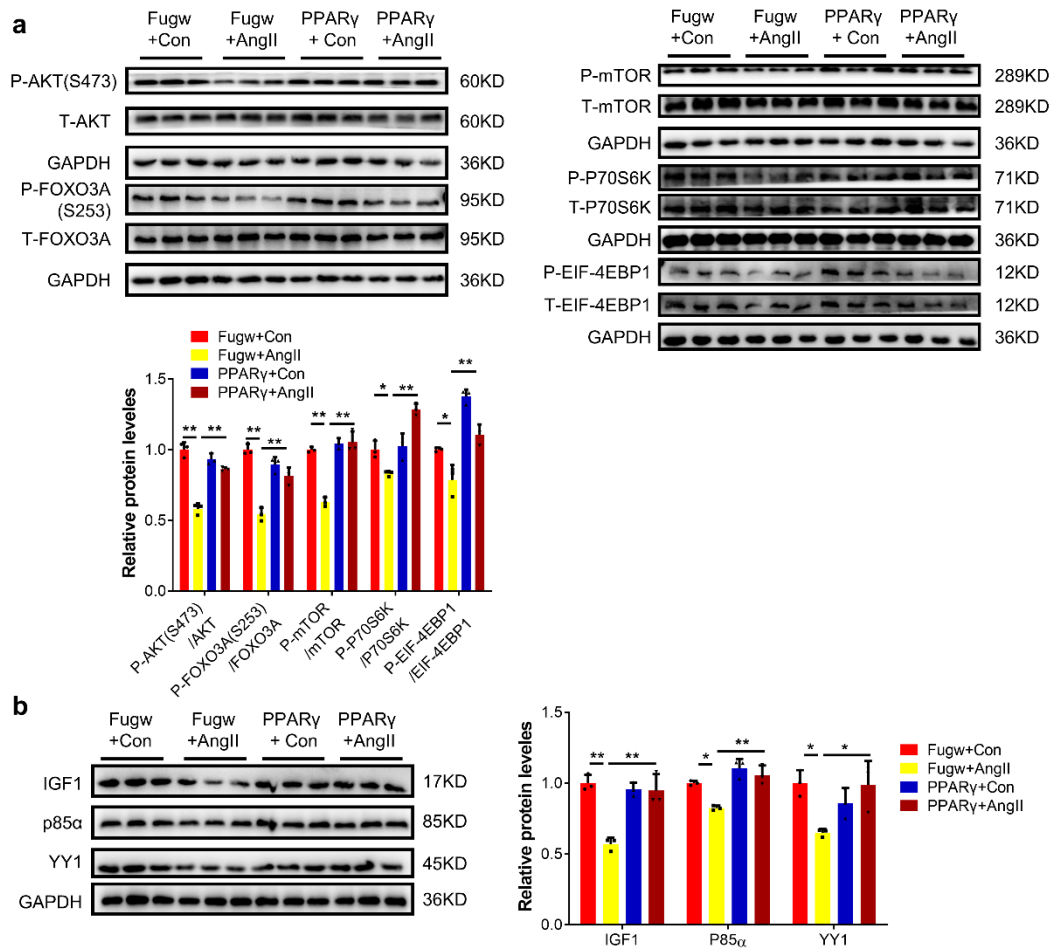

**Figure S8. Overexpression of PPAR $\gamma$  ameliorates AngII-induced muscle atrophy *in vivo*.** (a) Western blot analysis for the AKT/FOXO3A/mTOR pathway (AKT, FOXO3A, mTOR, P70S6K, 4EBP1) when control and AngII mice treated with Fugw or PPAR $\gamma$  overexpression lentivirus. n=3 per group. (b) Western blot analysis of IGF1, PI3K(p85 $\alpha$ ) and YY1 expression in control and AngII mice treated with Fugw or PPAR $\gamma$  overexpression lentivirus. n=3 per group. Data are shown as mean  $\pm$ SD. \*, P<0.05. \*\*, P<0.01.
